# Supplementary material for: Comparison of BARRA and ERA5 in Replicating Mean and Extreme Precipitation over Australia
Source: Copernicus journal article supplement (doi:10.5194/hess-2024-286), 2024-10-08
Supplement: Supplementary file 1 [file hess-2024-286-supplement.pdf]

**Supplementary Information for “Comparison of BARRA and ERA5 in replicating mean and extreme precipitation over Australia” by Cheung et al.**

Table S1 Summary of literature review in Section 1

| <b>Study</b>                               | <b>Reanalysis Datasets</b>                 | <b>Variables</b>                         | <b>Major Findings</b>                                                                                                     |
|--------------------------------------------|--------------------------------------------|------------------------------------------|---------------------------------------------------------------------------------------------------------------------------|
| Quagraine et al. (2020)                    | ERA-Interim, ERA5, JRA-55, MERRA2, NCEP-R2 | Precipitation                            | All represent monsoon rainfall pattern and seasonal cycle well over west Africa                                           |
| Dai et al. (2023)                          | ERA5                                       | Precipitation                            | Rainfall erosivity over Loess Plateau consistent with station data                                                        |
| Cheung et al. (2023)                       | ERA5                                       | Convective parameters                    | Applied to evaluate RCM simulations                                                                                       |
| Betts et al. (2019)                        | ERA-Interim, ERA5                          | Precipitation                            | Biases in ERA5 over Canadian Prairies smaller                                                                             |
| Hu and Yuan (2021) and Jiang et al. (2021) | ERA5                                       | Precipitation                            | Overall spatiotemporal patterns in Eastern Tibet Plateau captured, but under- (over-) estimated rain intensity (duration) |
| Jiao et al. (2021)                         | ERA5                                       | Precipitation                            | High spatiotemporal correlation with observation in China, but over-estimated summer rainfall                             |
| Izadi et al. (2021)                        | ERA5                                       | Precipitation                            | Monthly/seasonal rainfall matches with observation better than daily data in Iran                                         |
| Qin et al. (2021)                          | ERA5                                       | Precipitation                            | Over- (under-) estimated rain frequency (intensity) in China                                                              |
| Lei et al. (2022) and Shen et al. (2022)   | ERA5                                       | Extreme climate indices                  | Moderate extremes better estimated than high-end extremes                                                                 |
| Wang et al. (2019)                         | ERA-Interim, ERA5                          | Surface temperature, precipitation, snow | Warm biases over Arctic Sea, ERA5 has thinner ice thickness                                                               |
| Lei et al. (2020)                          | ERA-Interim, ERA5                          | Cloud cover                              | ERA5 much better than ERA-Interim over east China but not Tibet Plateau                                                   |
| Gleixner et al. (2020)                     | ERA-Interim, ERA5                          | Temperature, precipitation               | Biases smaller and interannual variability improved over East Africa                                                      |
| Song and Wei (2021)                        | ERA5, MERRA-2                              | Precipitation                            | Both have reasonable diurnal cycle over north China, ERA5 has better afternoon peak                                       |
| Li et al. (2022)                           | ERA-Interim, ERA5, JRA55, MERRA            | Precipitation                            | ERA5 generally better than the other over the Poyang Lake Basin, China                                                    |
| May et al. (2021)                          | BARRA                                      | Surface variables                        | High correlations with station data over Northern Australia                                                               |

|                             |                                     |                                                        |                                                                                                                         |
|-----------------------------|-------------------------------------|--------------------------------------------------------|-------------------------------------------------------------------------------------------------------------------------|
| Pirooz et al. (2021)        | ERA-Interim, ERA5, ERA5-land, BARRA | Winds, precipitation, temperature                      | BARRA better than the ERA's for precipitation and temperature, good gust wind speed but ERA5 the best in gust frequency |
| Du et al. (2023)            | BARRA                               | Precipitation                                          | Climatology for ungauged catchments in Australia                                                                        |
| Hobeichi et al. (2023)      | BARRA, BARRA-C                      | Various                                                | Applied to train statistical downscaling models                                                                         |
| Su et al. (2019)            | BARRA, ERA-Interim, MERRA-2         | Surface temperature and pressure, winds, precipitation | Smaller biases over Australia in BARRA compared with the other two                                                      |
| Acharya et al. (2019, 2020) | BARRA                               | Precipitation                                          | Daily / sub-daily rain better over temperate Australia than tropical region                                             |
| Nishant et al. (2022)       | BARRA, BARRA-C                      | Precipitation                                          | High-resolution BARRA-C only better in specific locations                                                               |
| Choudhury et al. (2023)     | ERA5                                | Extreme temperature                                    | Mean temperature better than the extremes                                                                               |
| <b>This study</b>           | <b>BARRA, ERA5</b>                  | <b>Precipitation, climate extreme indices</b>          | <b>Section 6</b>                                                                                                        |

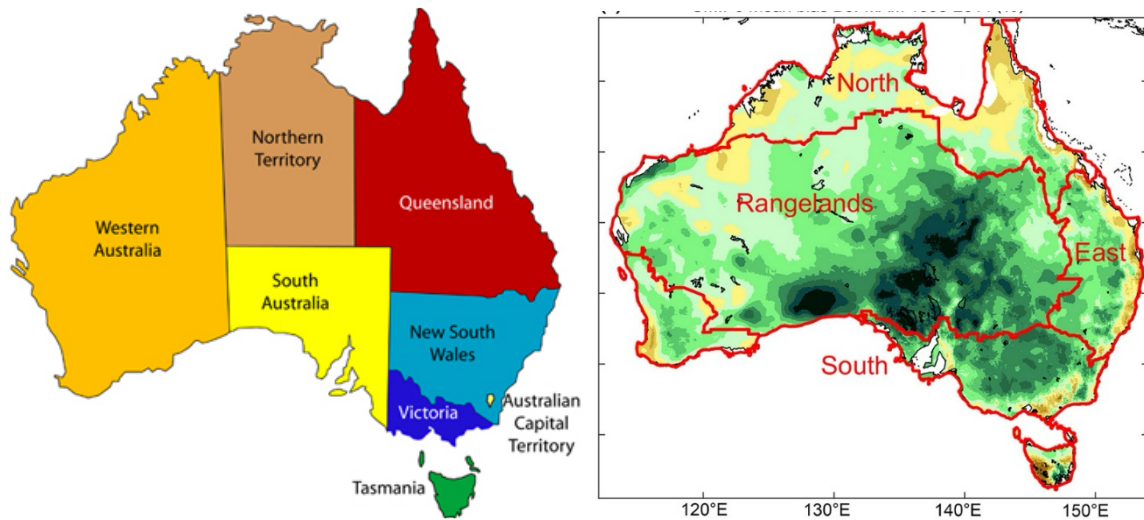

Figure S 1 Australia map with states and territories (left) with borders of the four “supercluster” averaging regions (right): Northern Australia (North), Rangelands, Southern Australia (South), Eastern Australia (East) and topography.

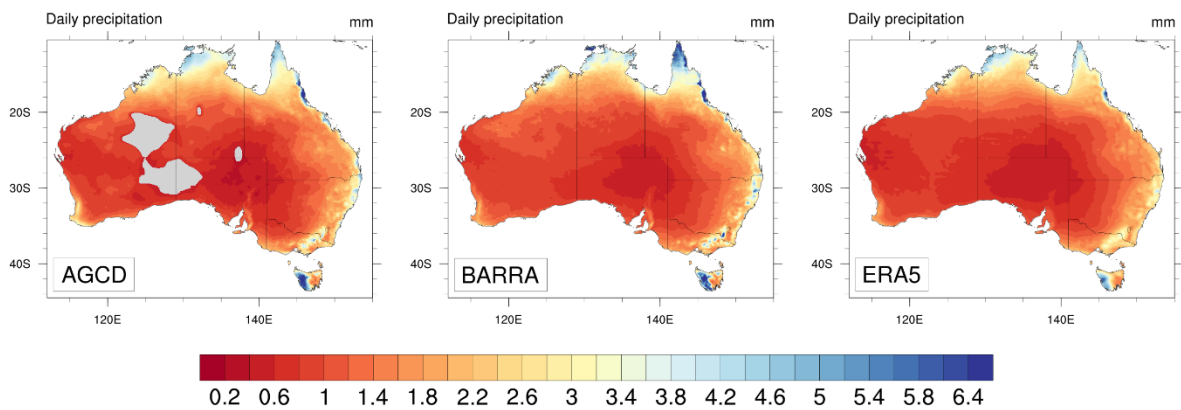

Figure S 2 Annual mean precipitation of AGCD, BARRA and ERA5 on AGCD grids.

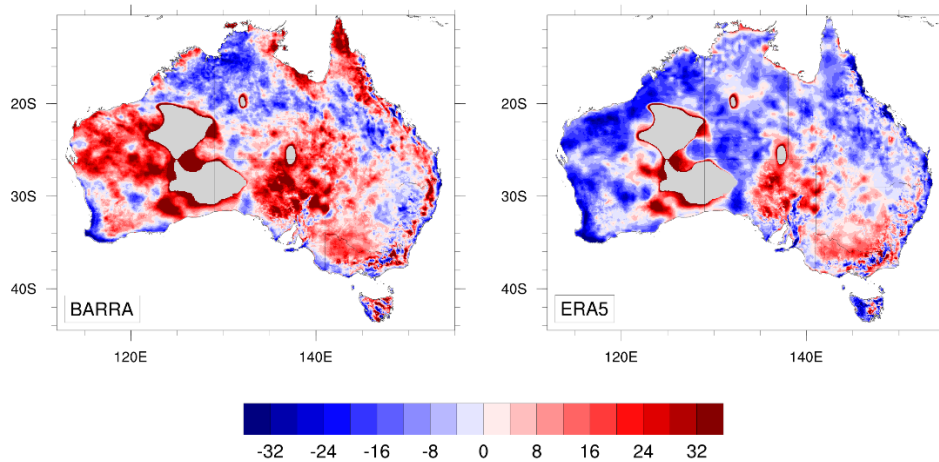

Figure S 3 Relative bias (%) of precipitation in BARRA and ERA5 evaluated at 5-km resolution (AGCD grids).

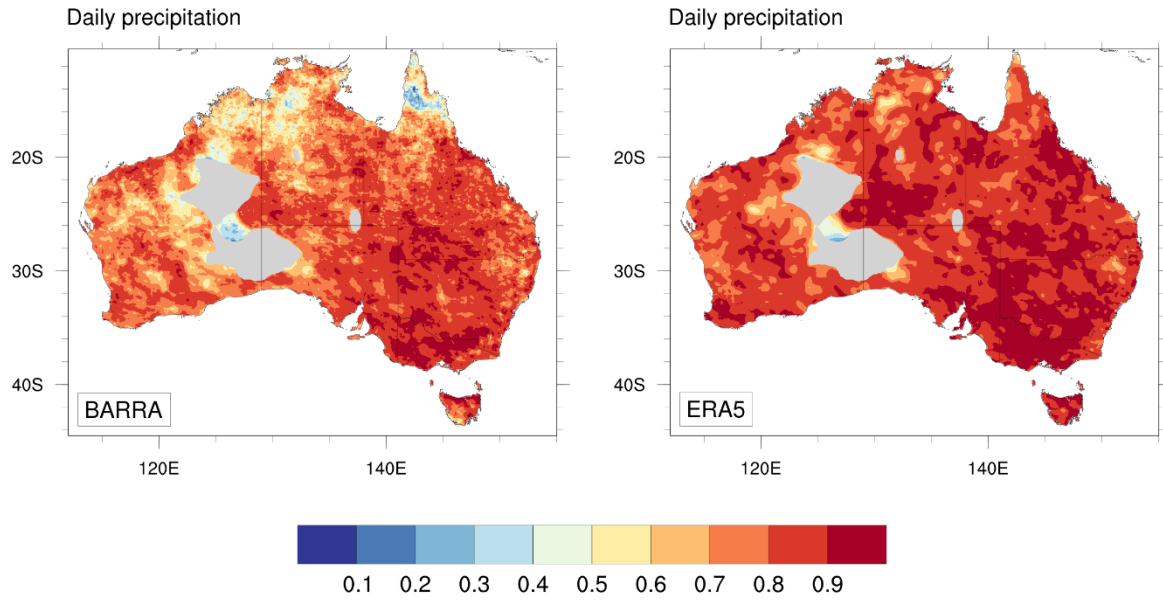

Figure S 4 Temporal correlation coefficient of annual precipitation between BARRA/ERA5 and AGCD on AGCD grids.

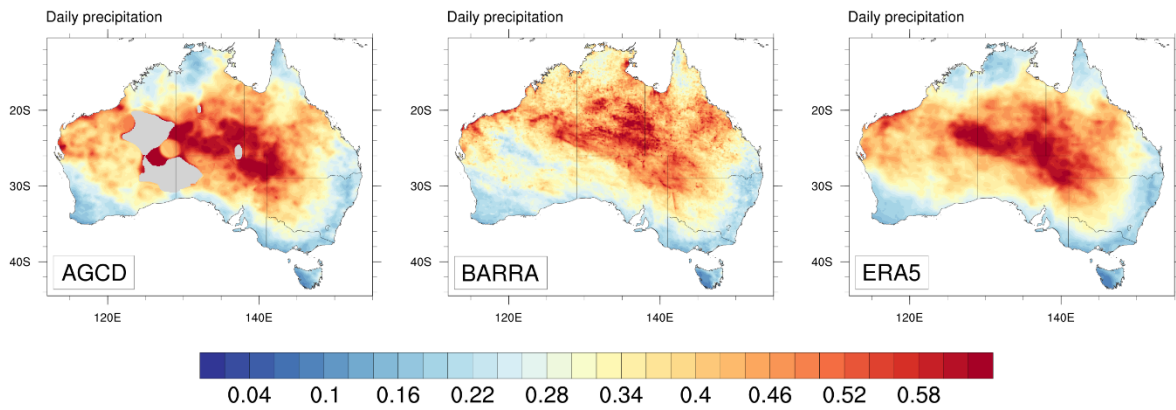

Figure S 5 CV of annual precipitation for AGCD, BARRA and ERA5 on AGCD grids.

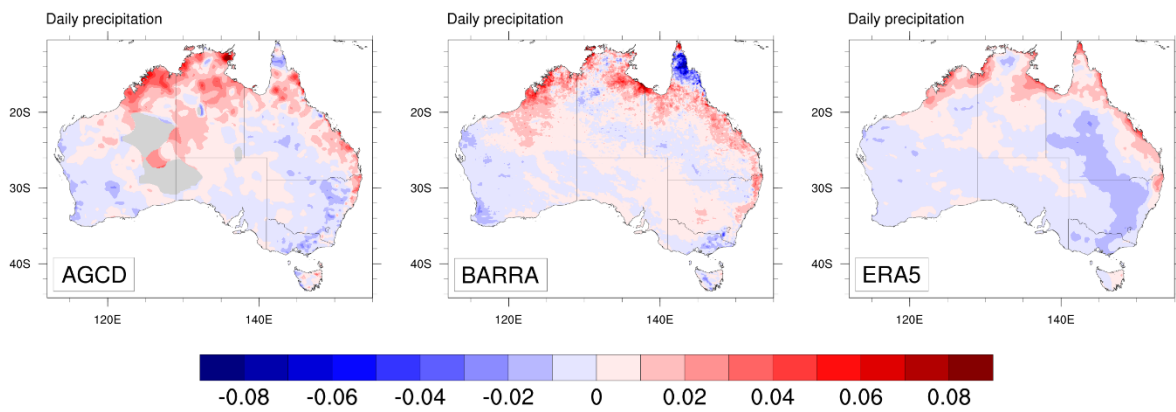

Figure S 6 Trend of annual precipitation for AGCD, BARRA and ERA5 on AGCD grids.

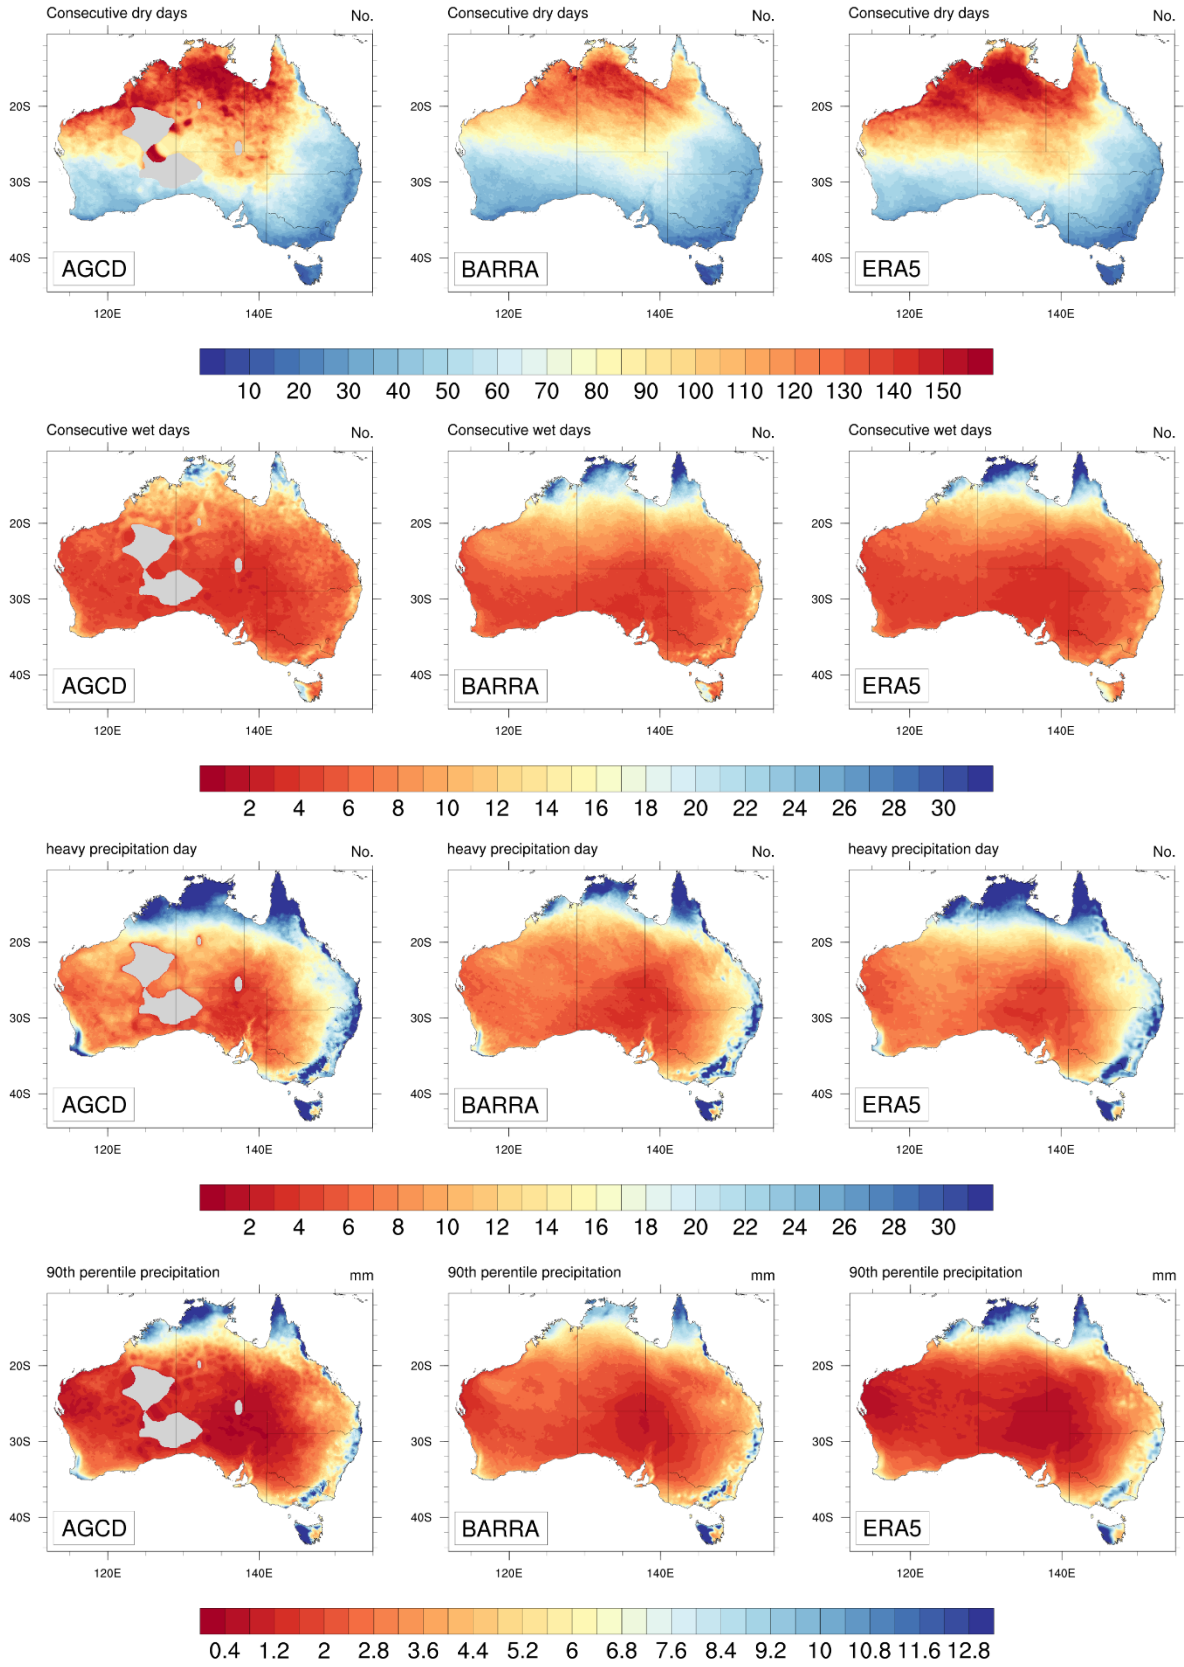

Figure S 7 Mean CDD, CWD, R10mm, R90p, R99p and Rx1day of AGCD, BARRA and ERA5 on AGCD grids.

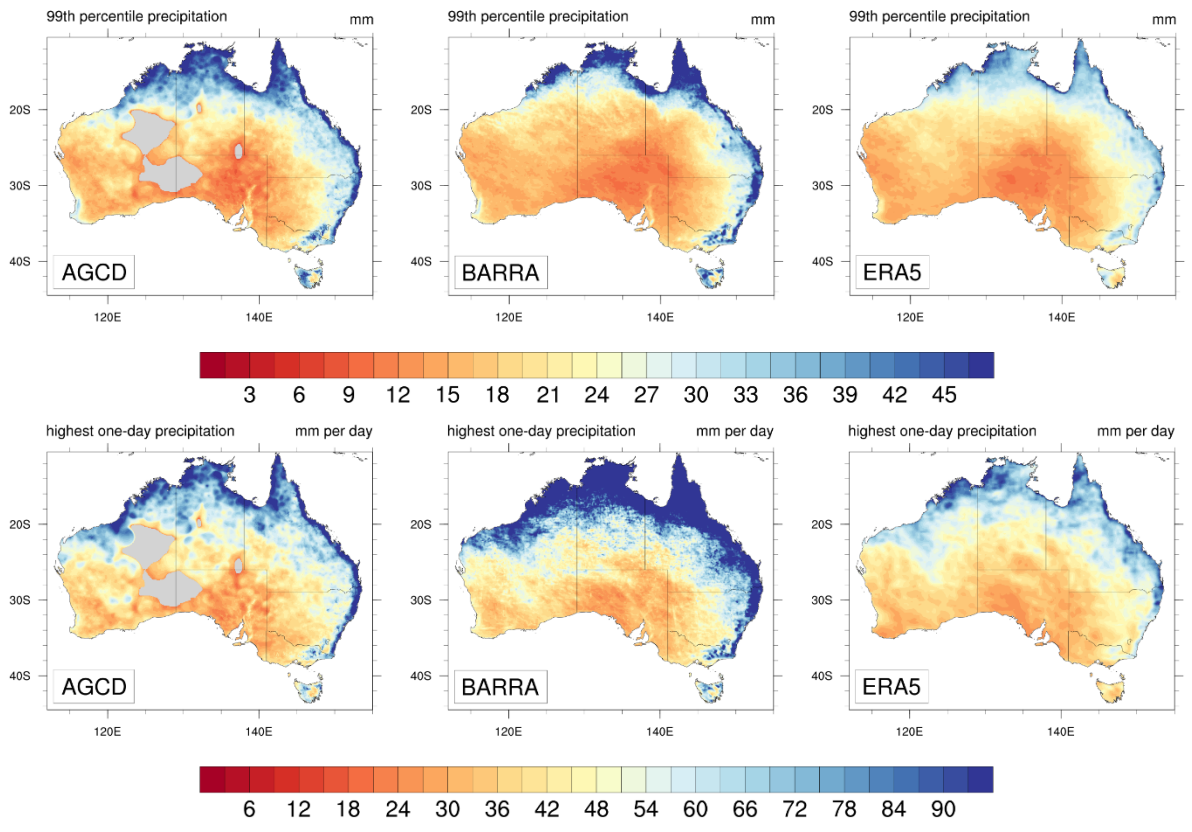

Figure S 7 (continued).

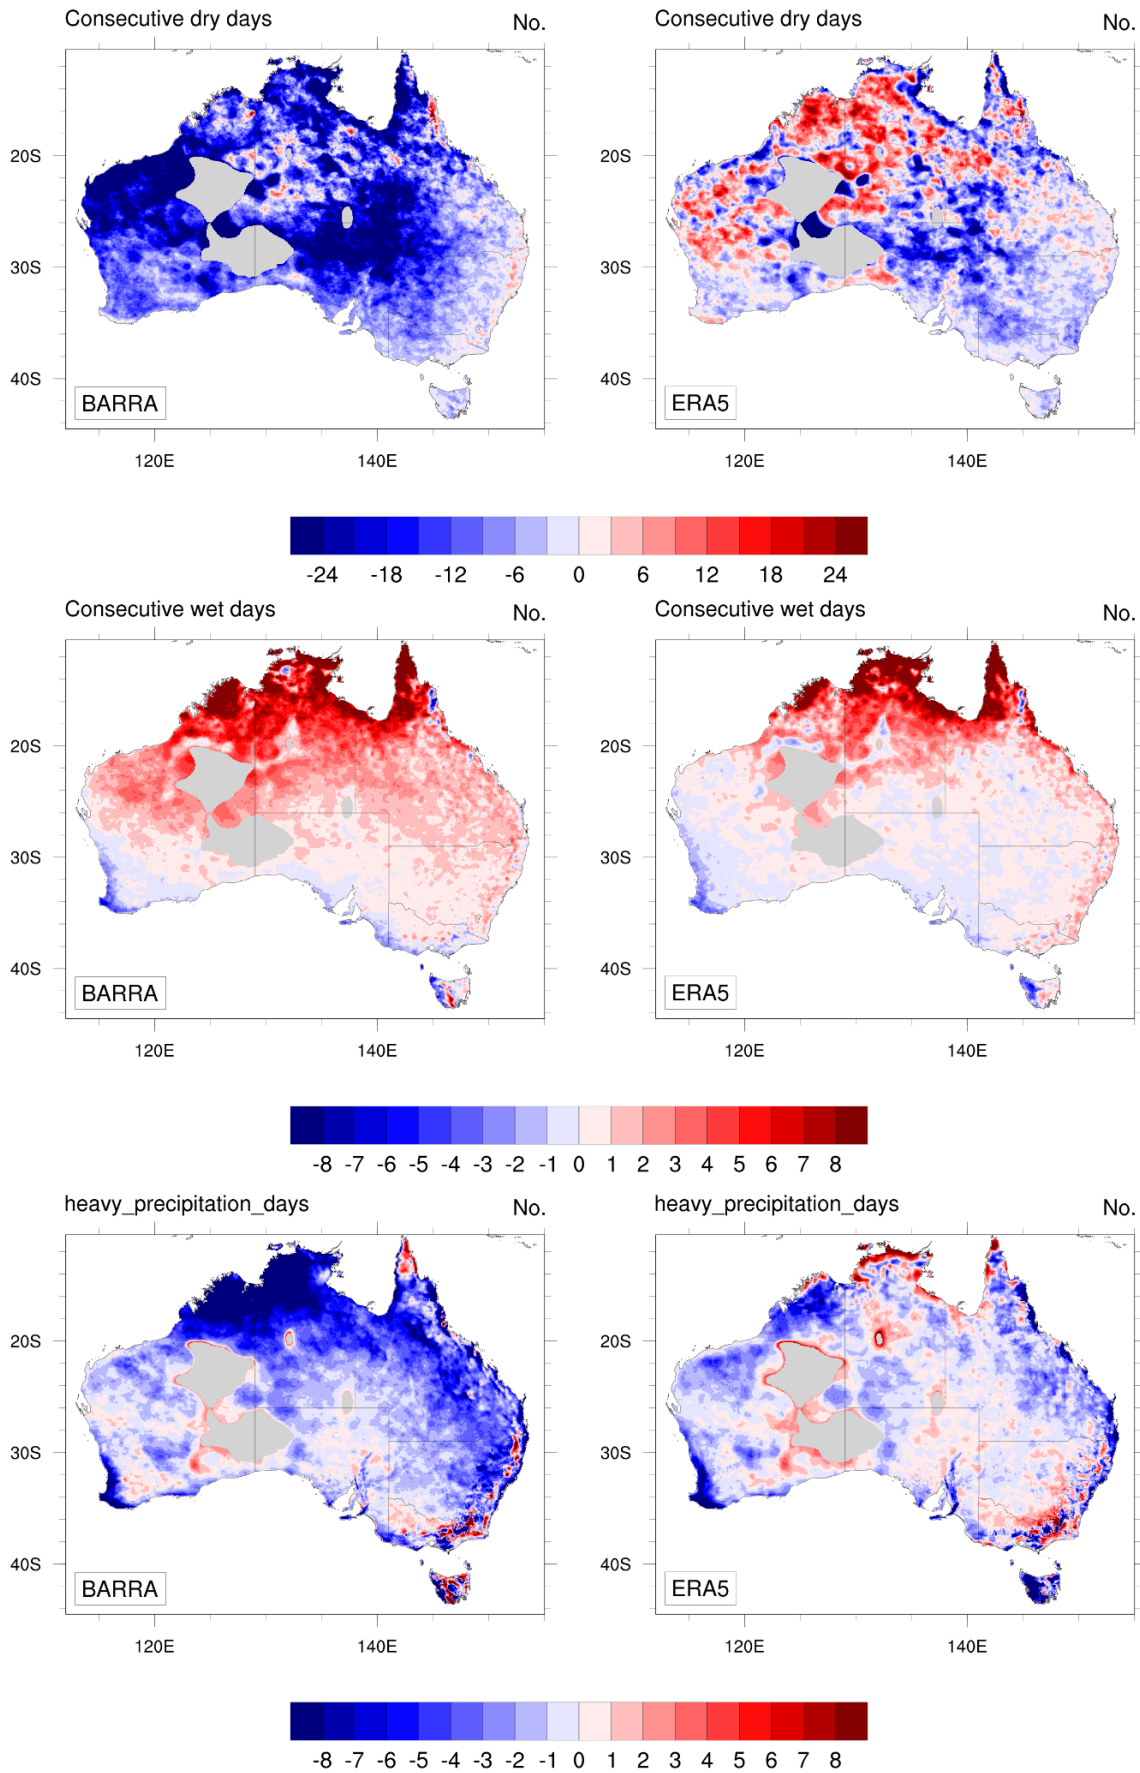

Figure S 8 Biases in CDD, CWD, R10mm, R90p, R99p and Rx1Day in BARRA (left column) and ERA5 (right column) on AGCD grids.

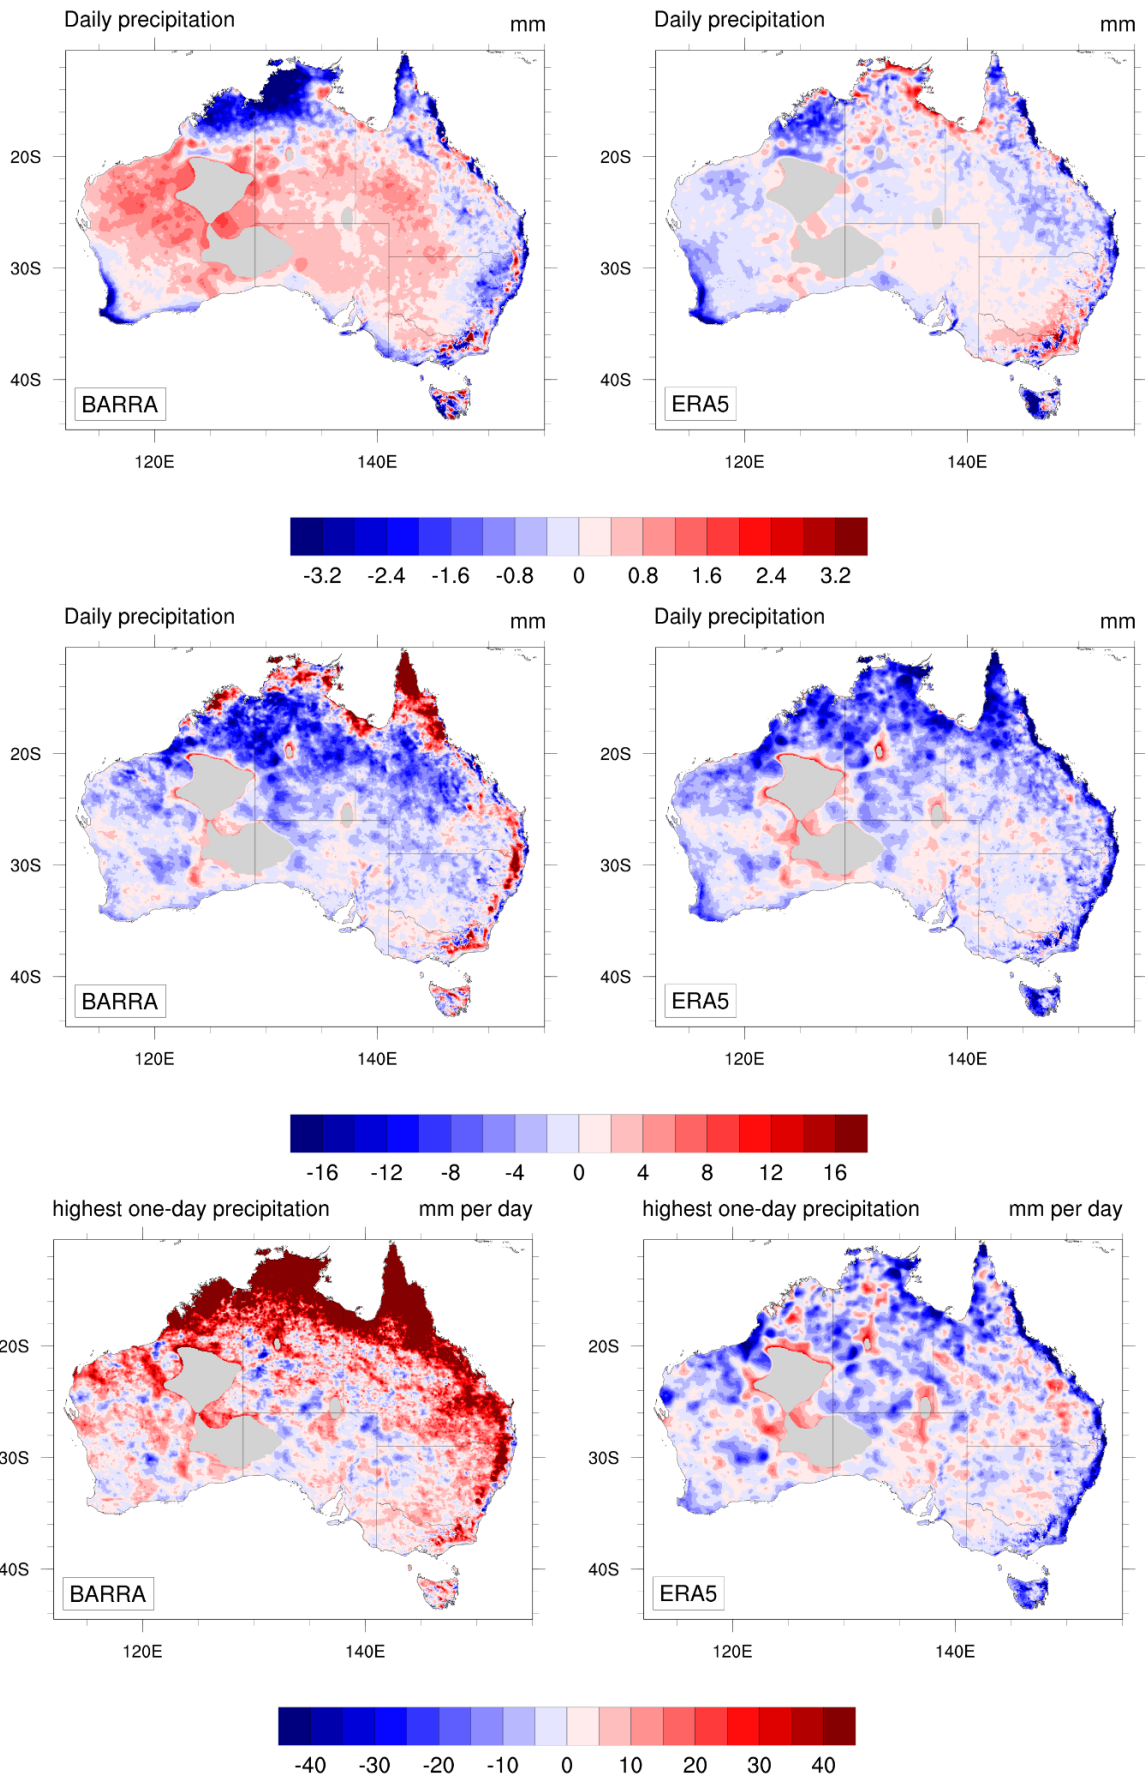

Figure S 8 (continued).



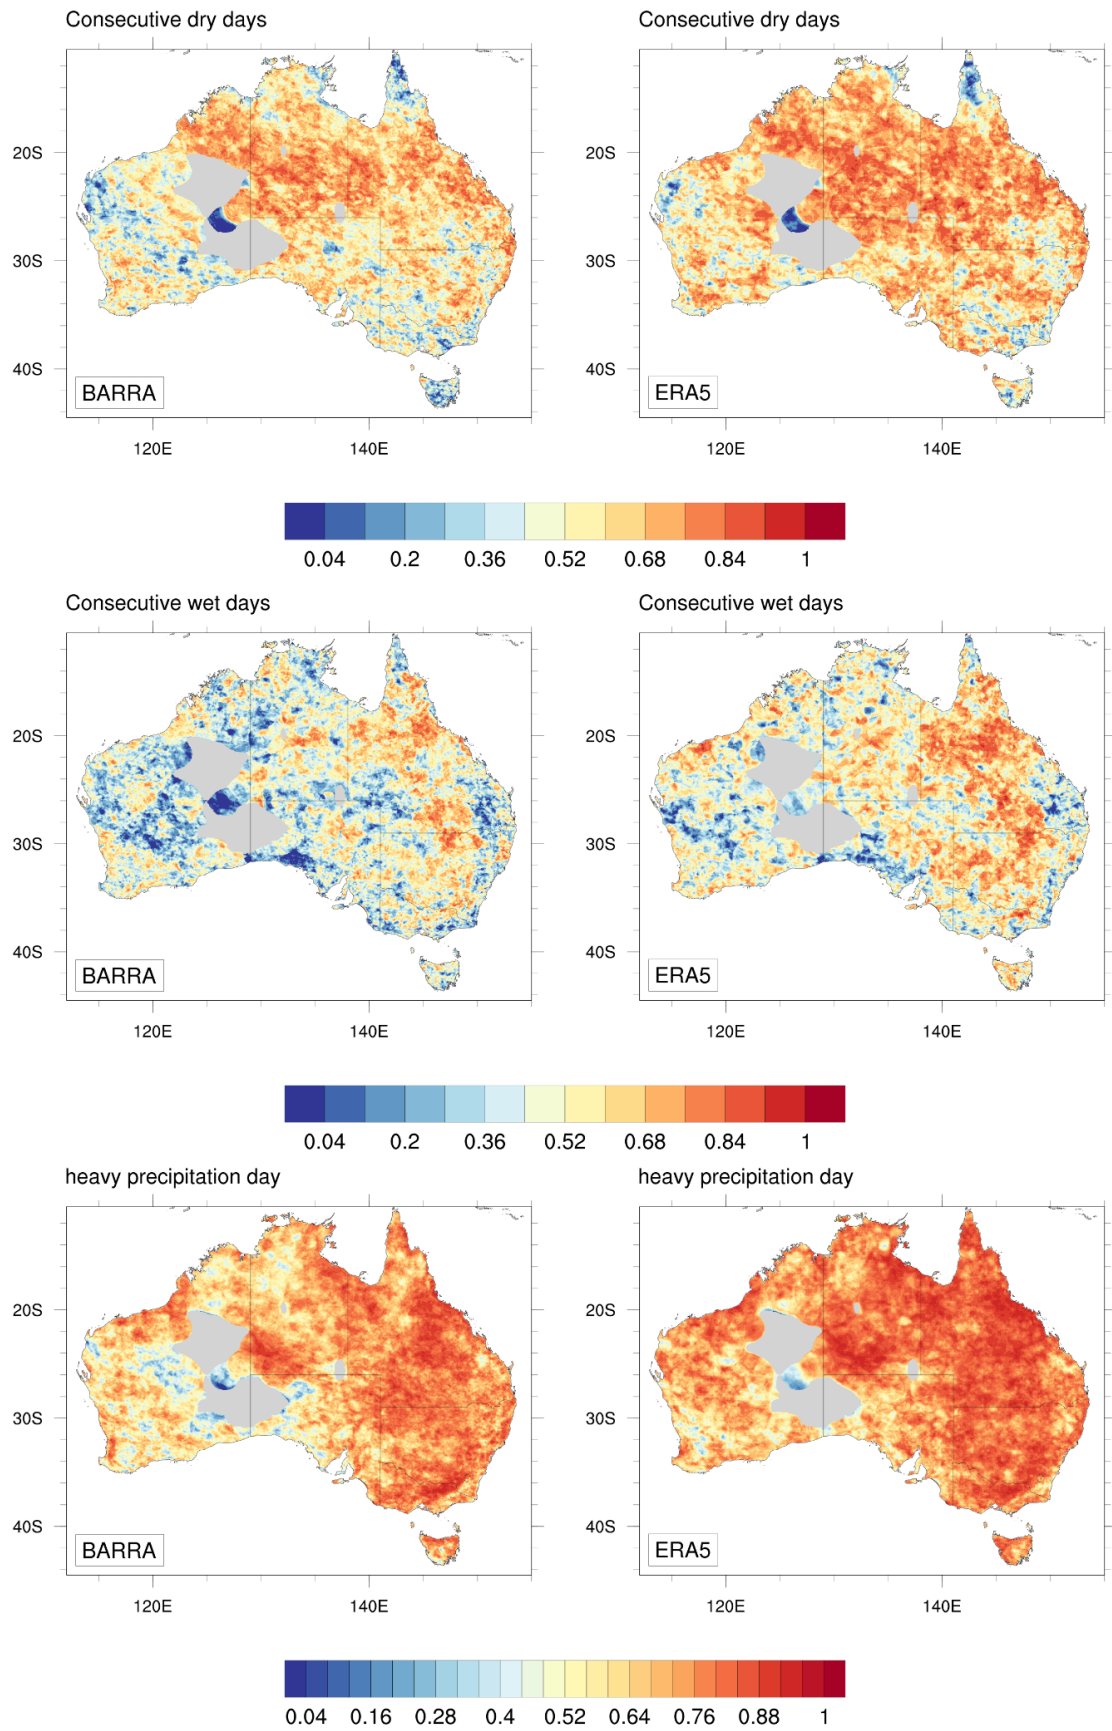

Figure S 9 Temporal correlation of CDD, CWD, R10mm, R90p, R99p and Rx1Day between BARRA and AGCD (left column) and between ERA5 and AGCD (right column) on AGCD grids.

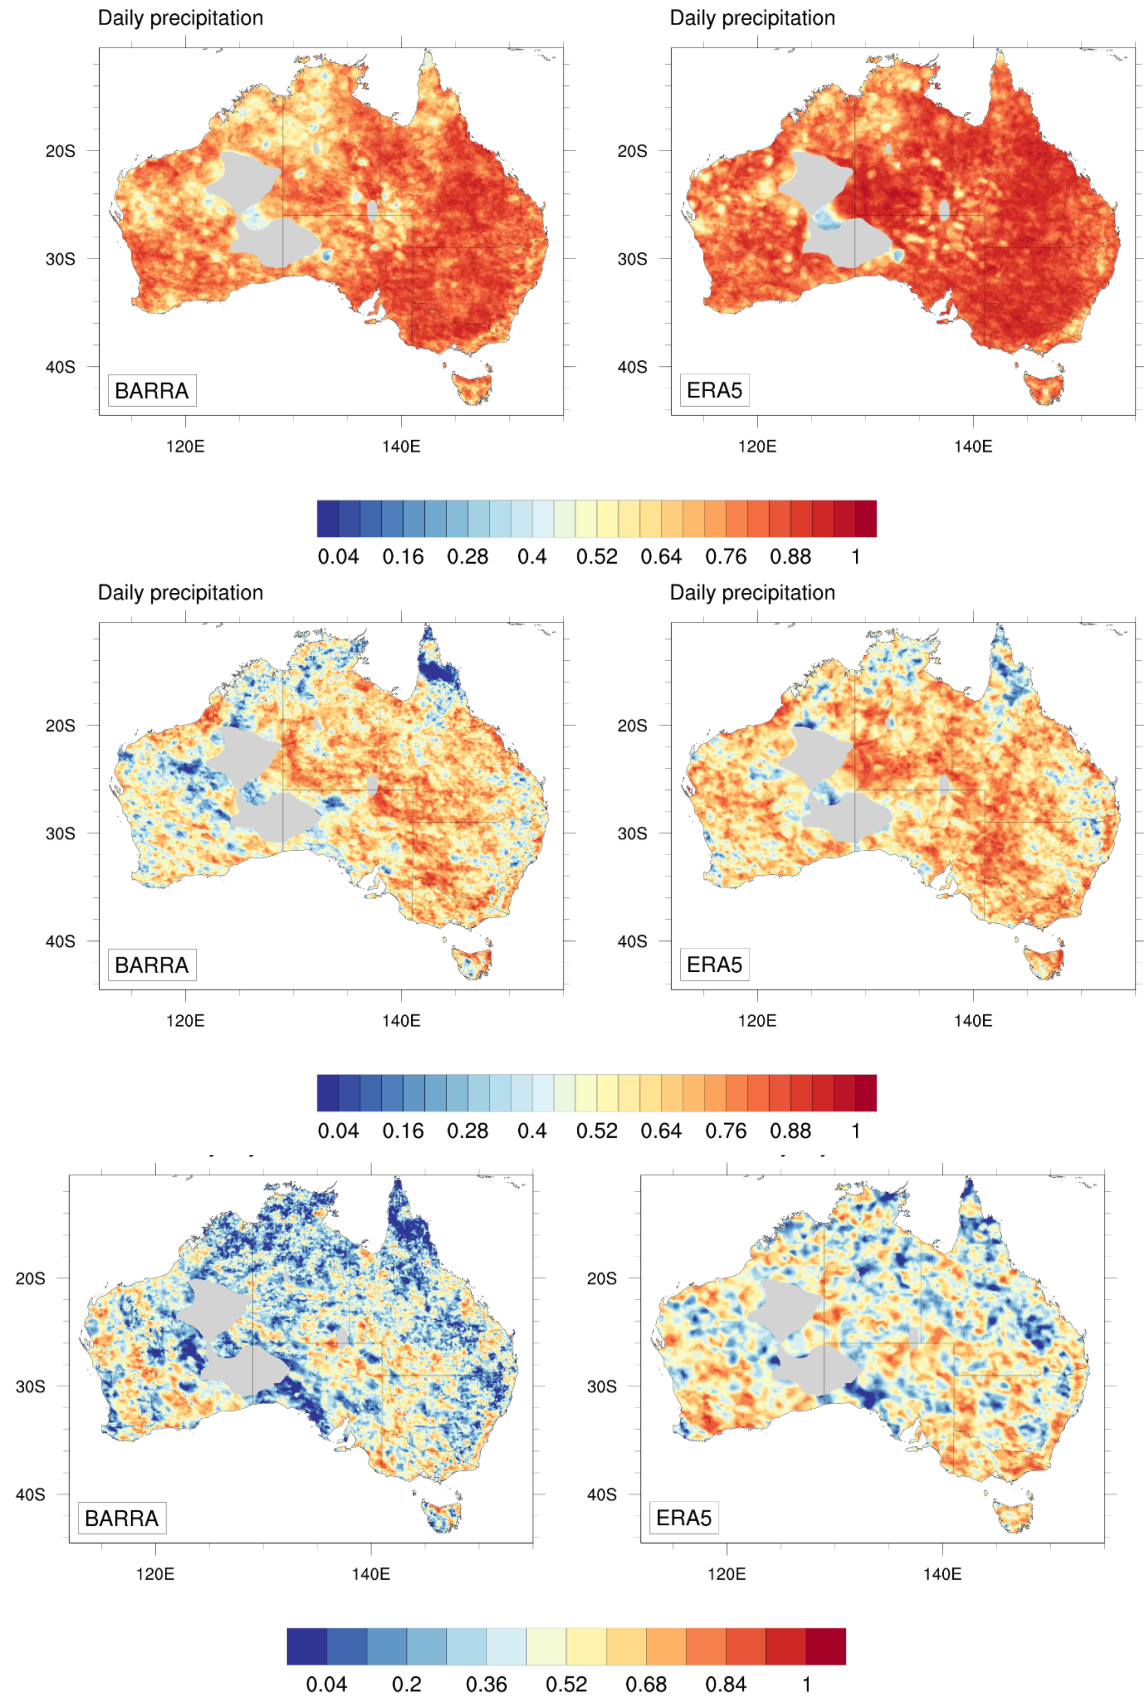

Figure S 9 (continued).

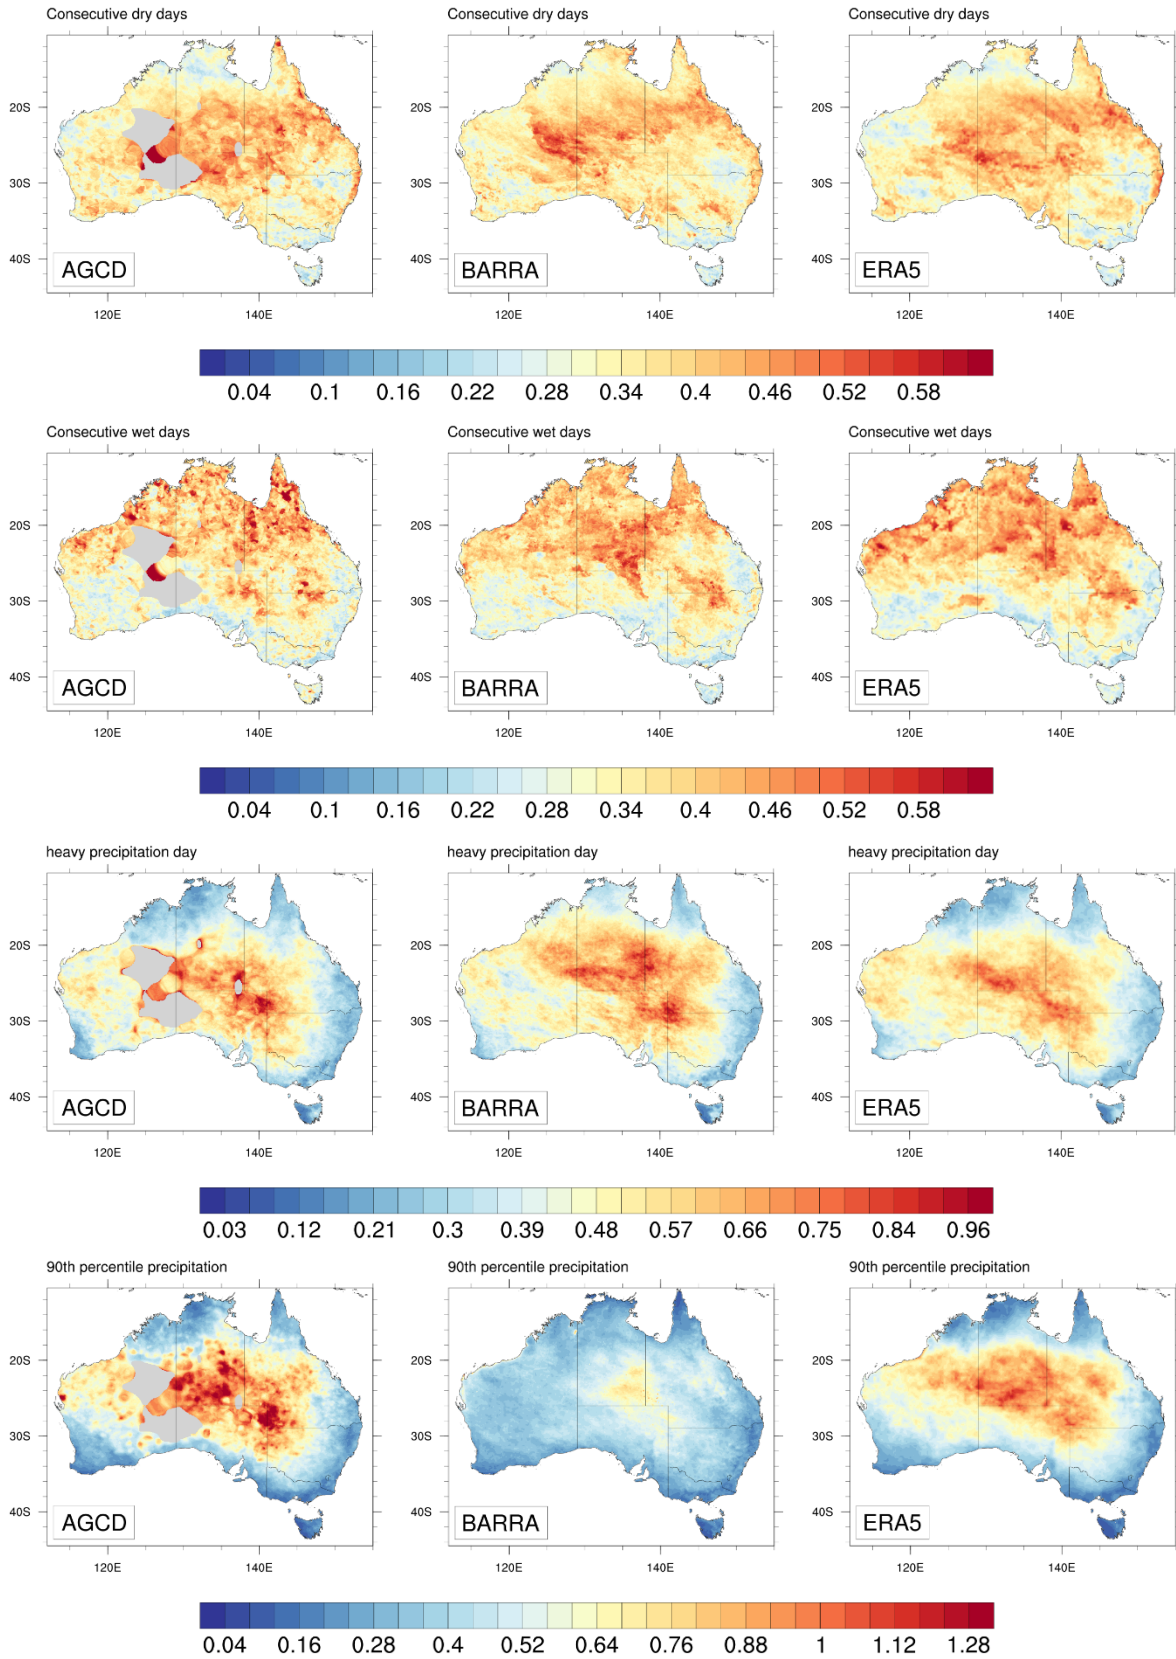

Figure S 10 CV of annual precipitation, CDD, CWD, R10mm, R90p, R99p and Rx1day for AGCD, BARRA and ERA5, on AGCD grids.

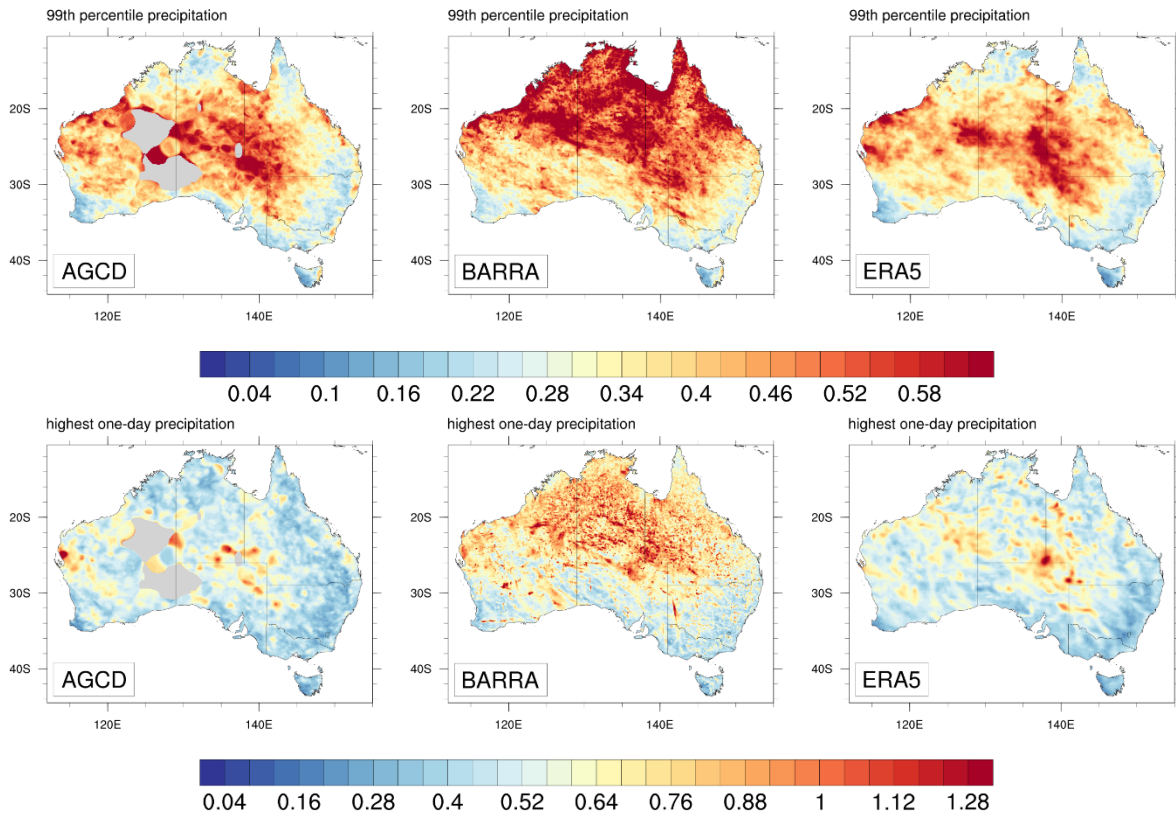

Figure S 10 (continued).

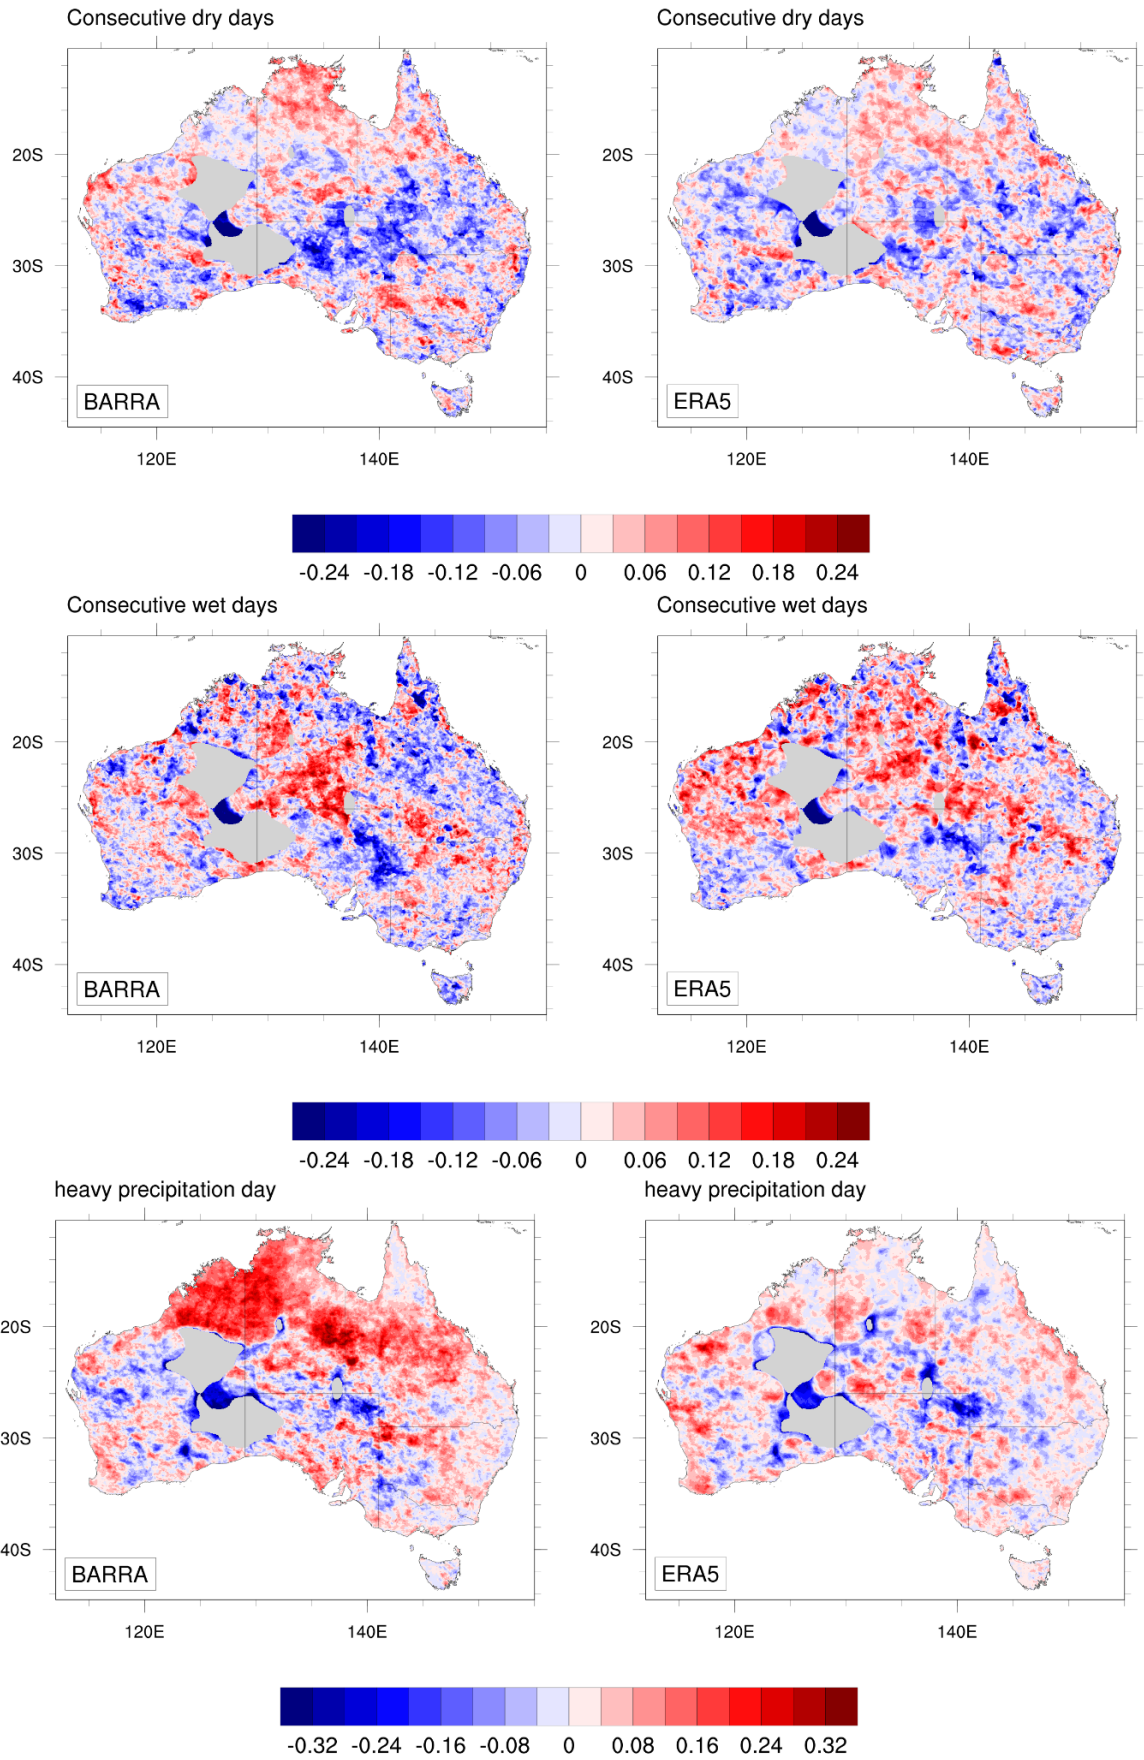

Figure S 11 Biases in CV of CDD, CWD, R10mm, R90p, R99p and Rx1Day for BARRA (left column) and ERA5 (right column) relative to AGCD, on AGCD grids.

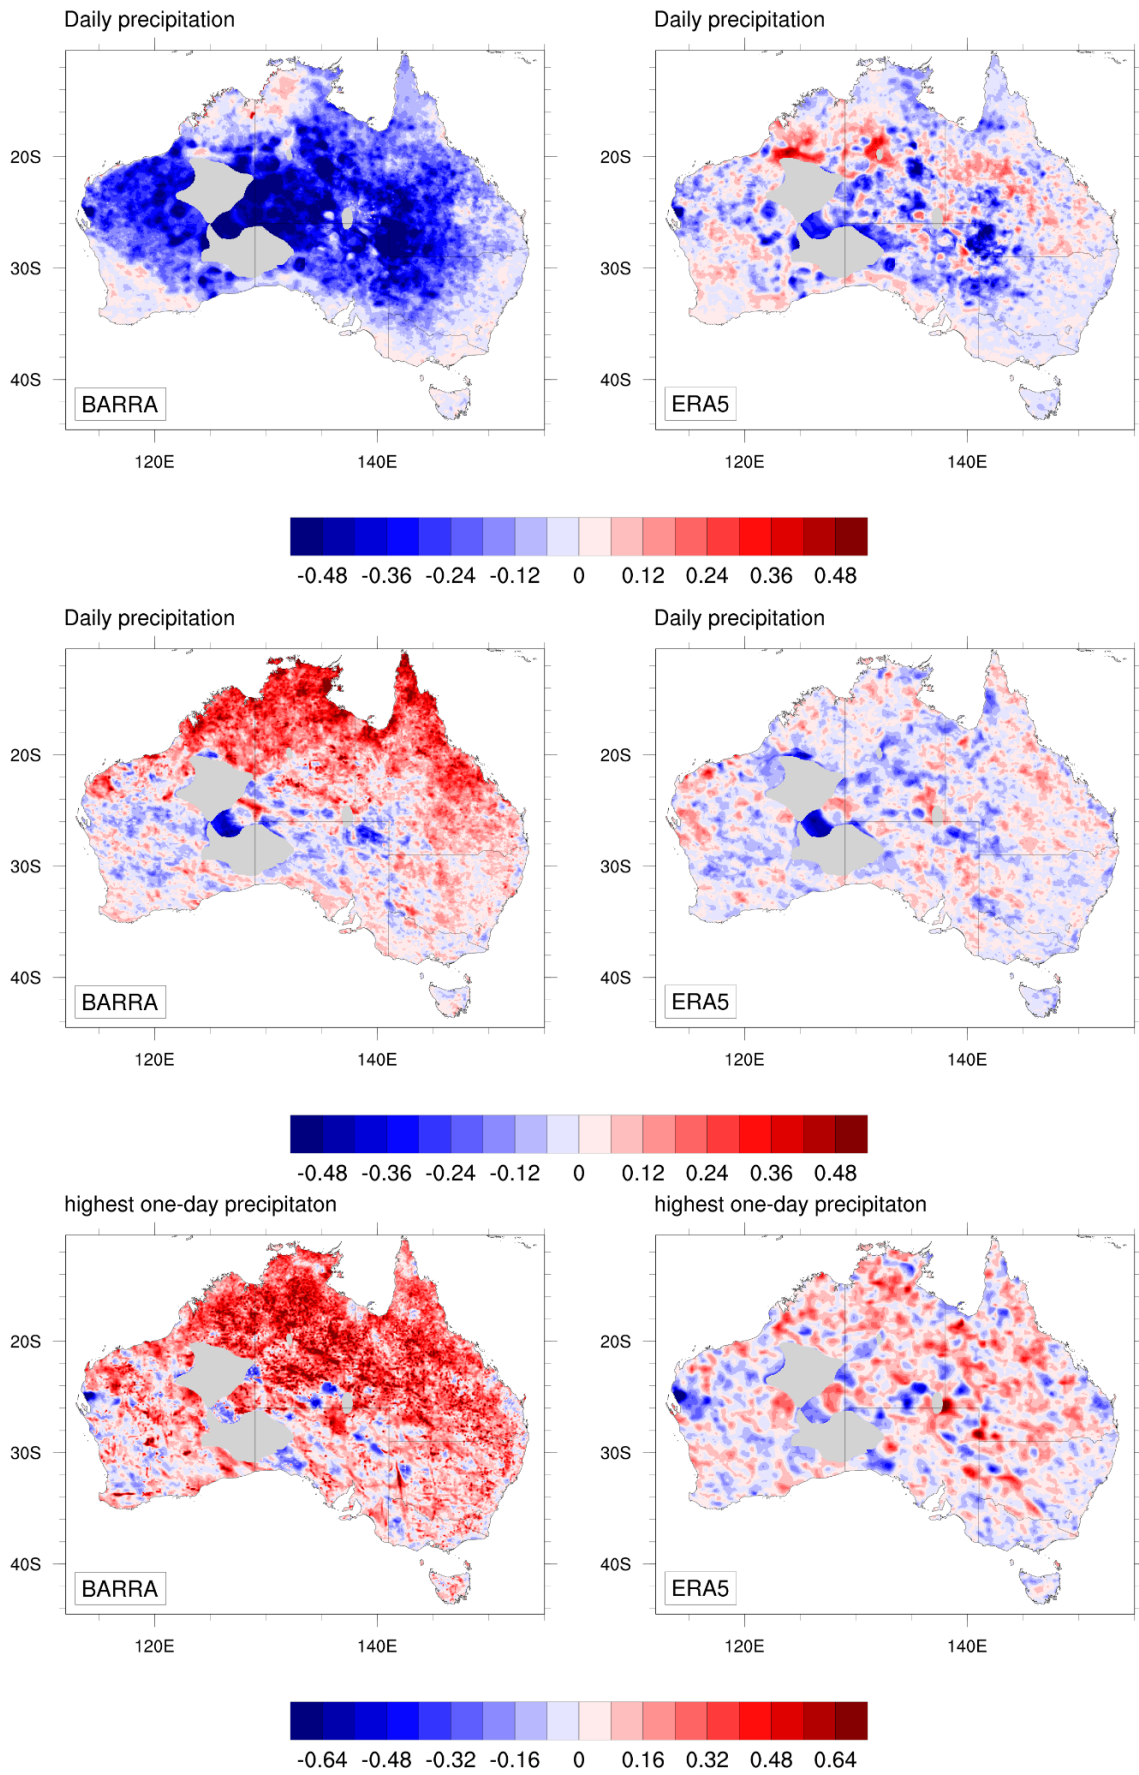

Figure S 11 (continued).

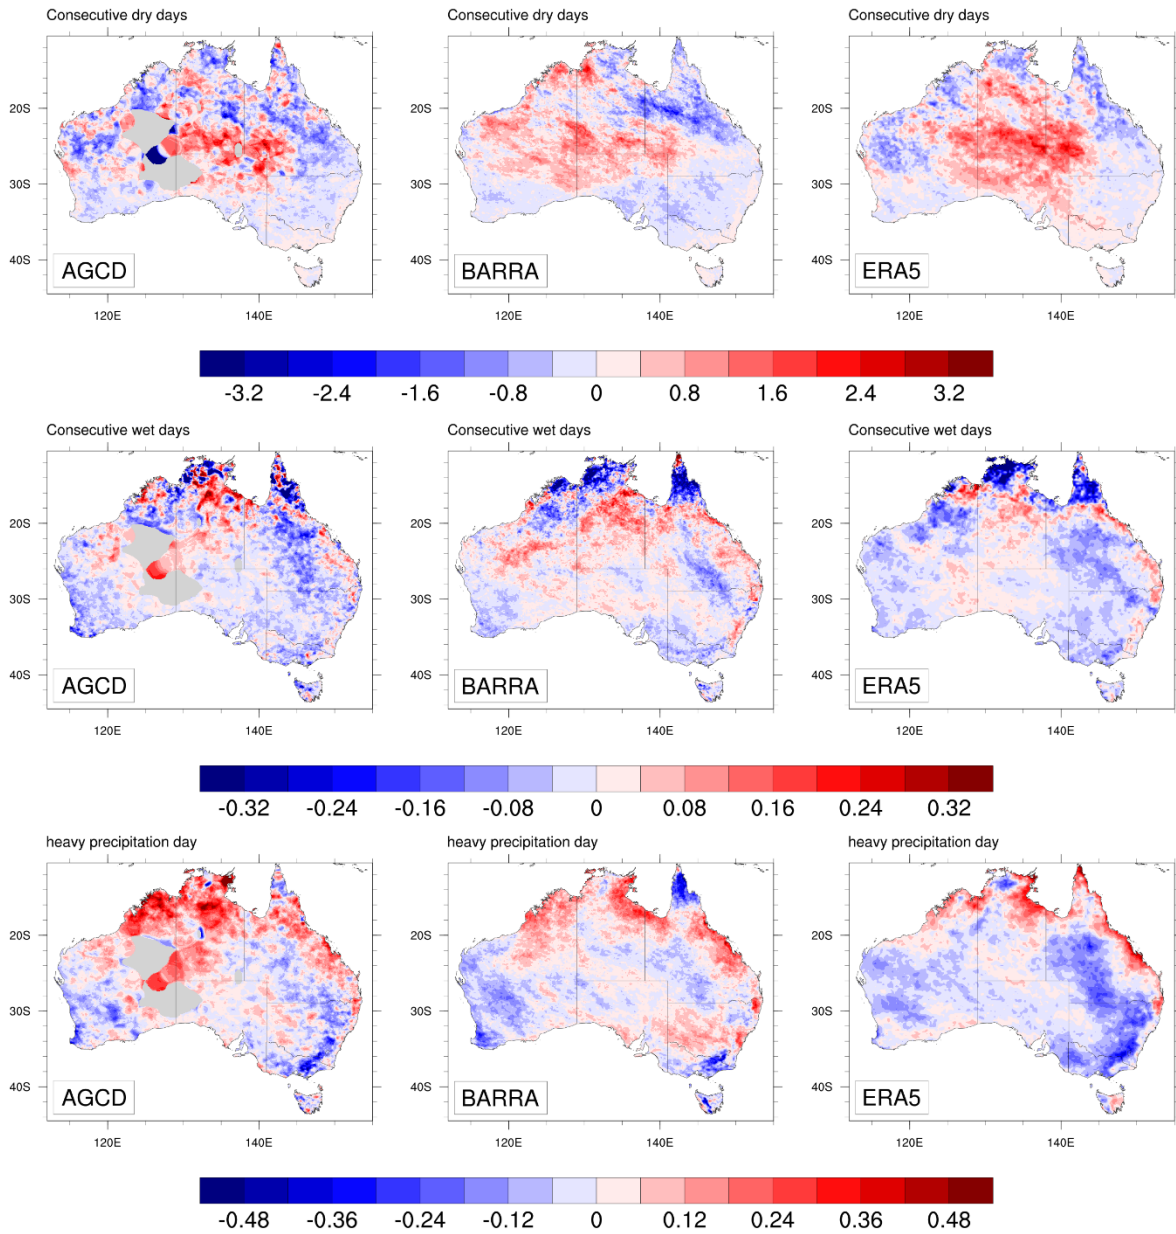

Figure S 12 Trend of annual precipitation, CDD, CWD, R10mm, R90p, R99p and Rx1day for AGCD, BARRA and ERA5, on AGCD grids.

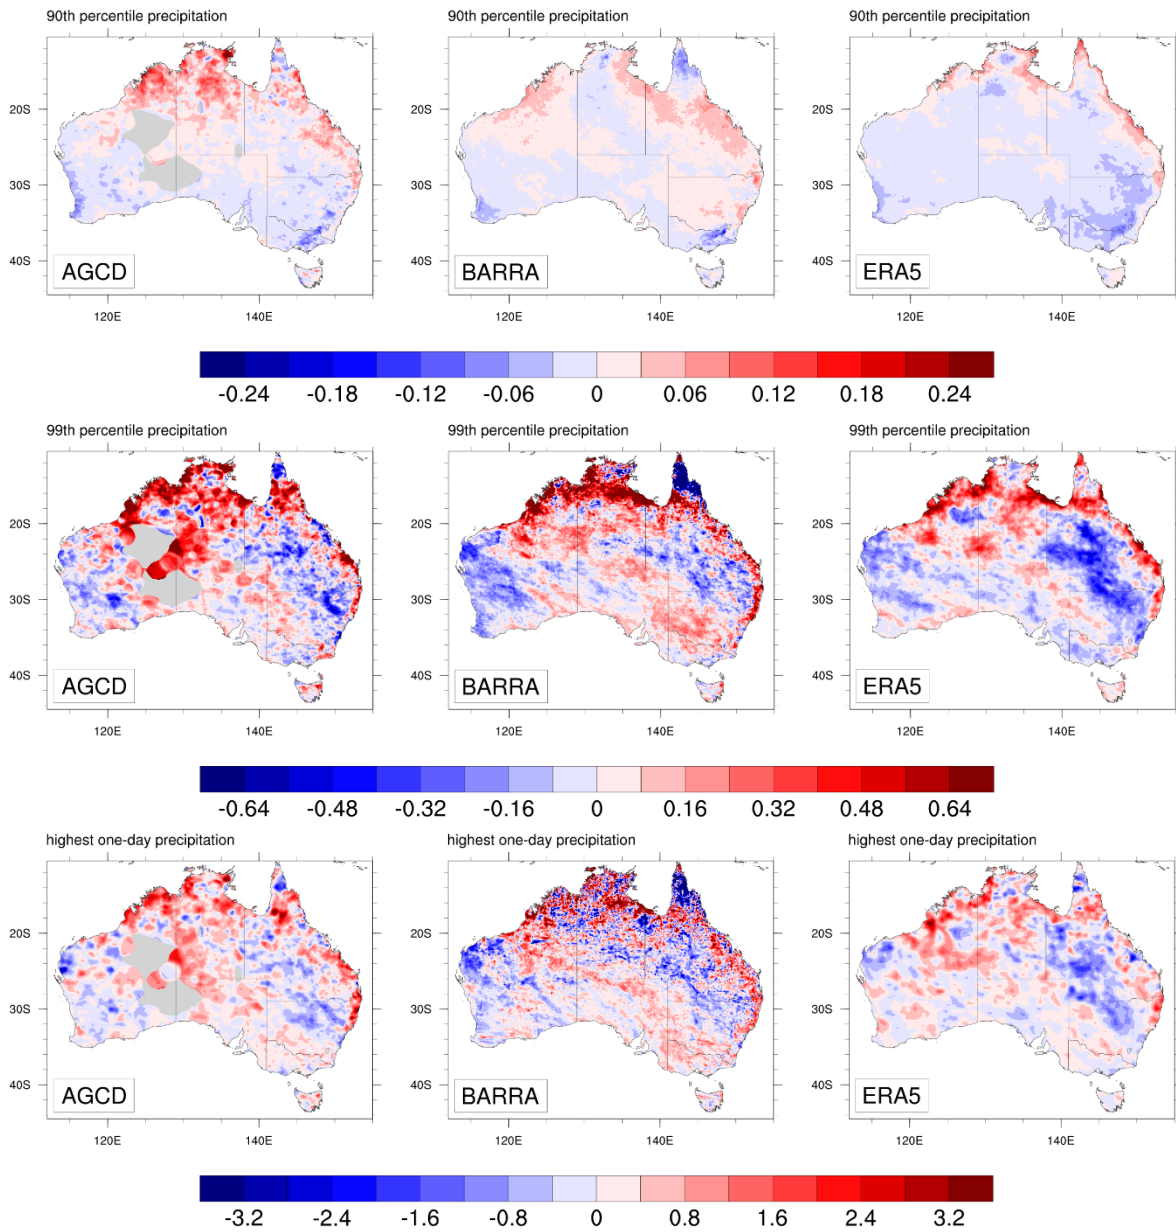

Figure S 12 (continued).



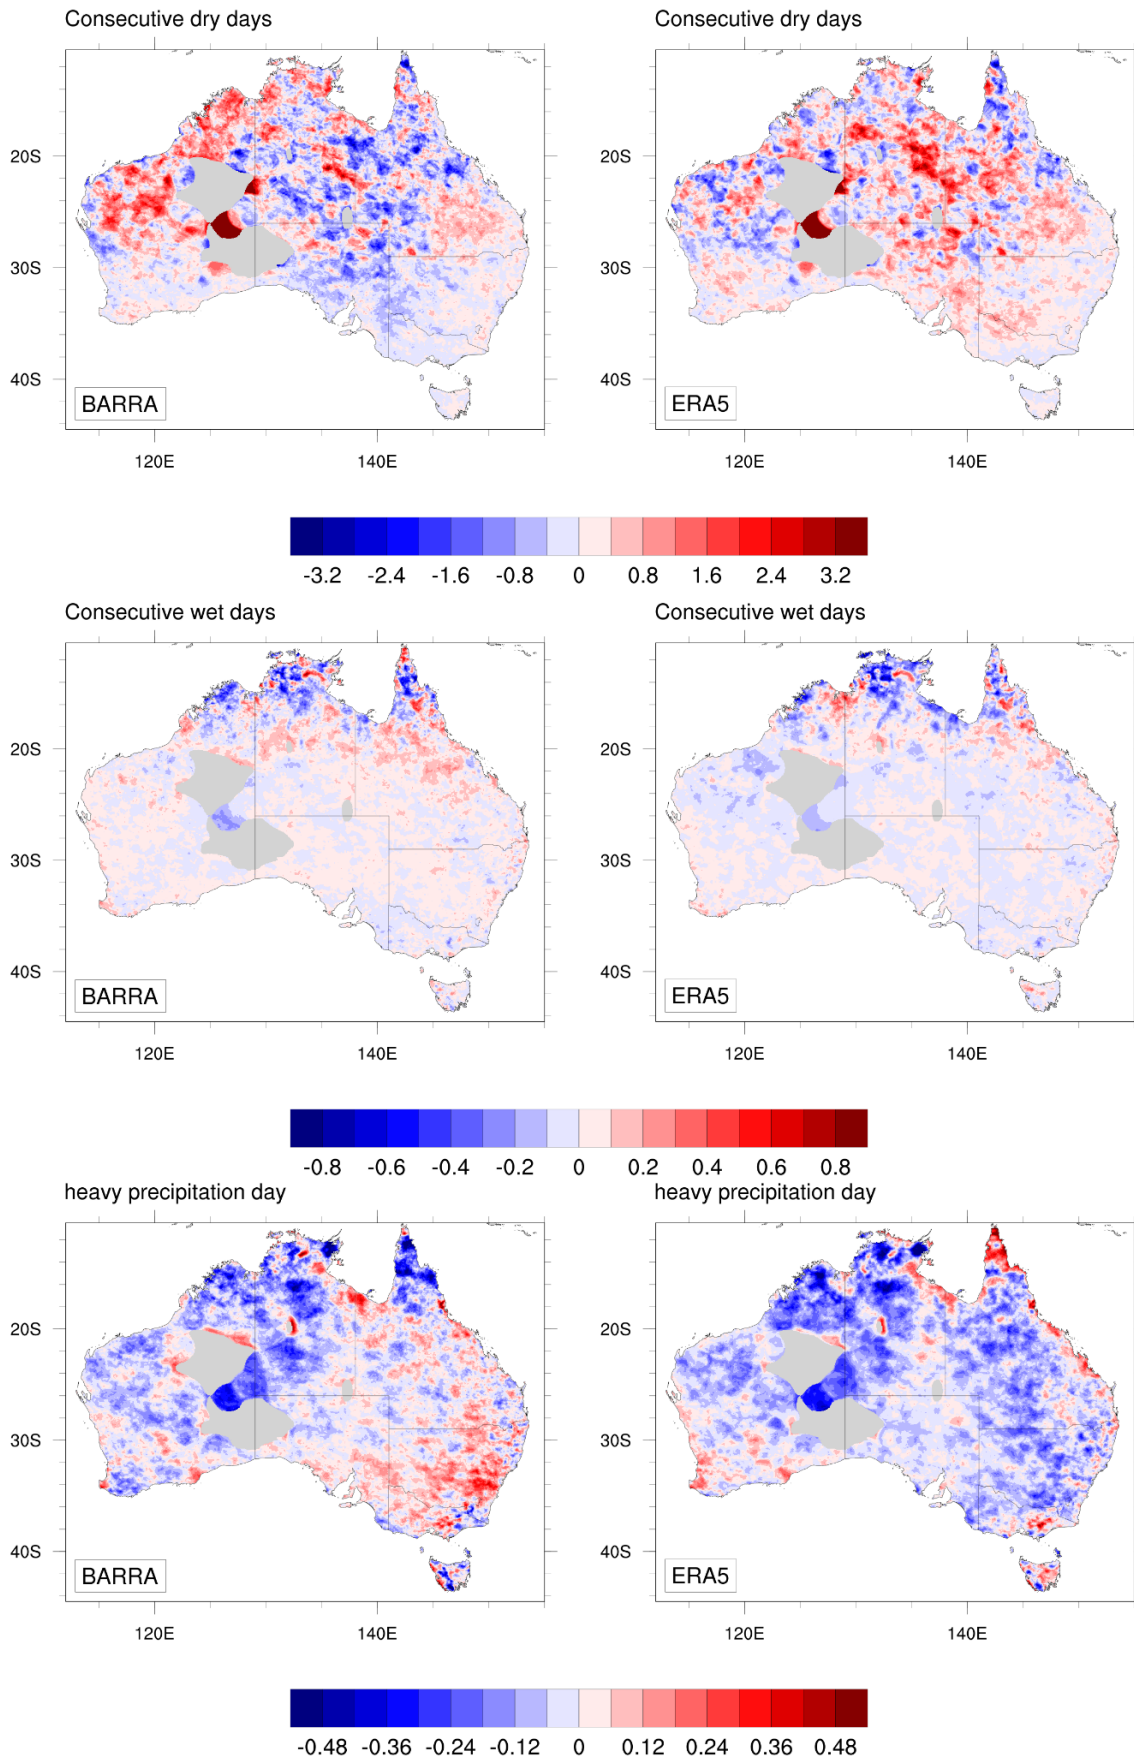

Figure S 13 Biases in trends of CDD, CWD, R10mm, R90p, R99p and Rx1Day for BARRA (left column) and ERA5 (right column) relative to AGCD, on AGCD grids.

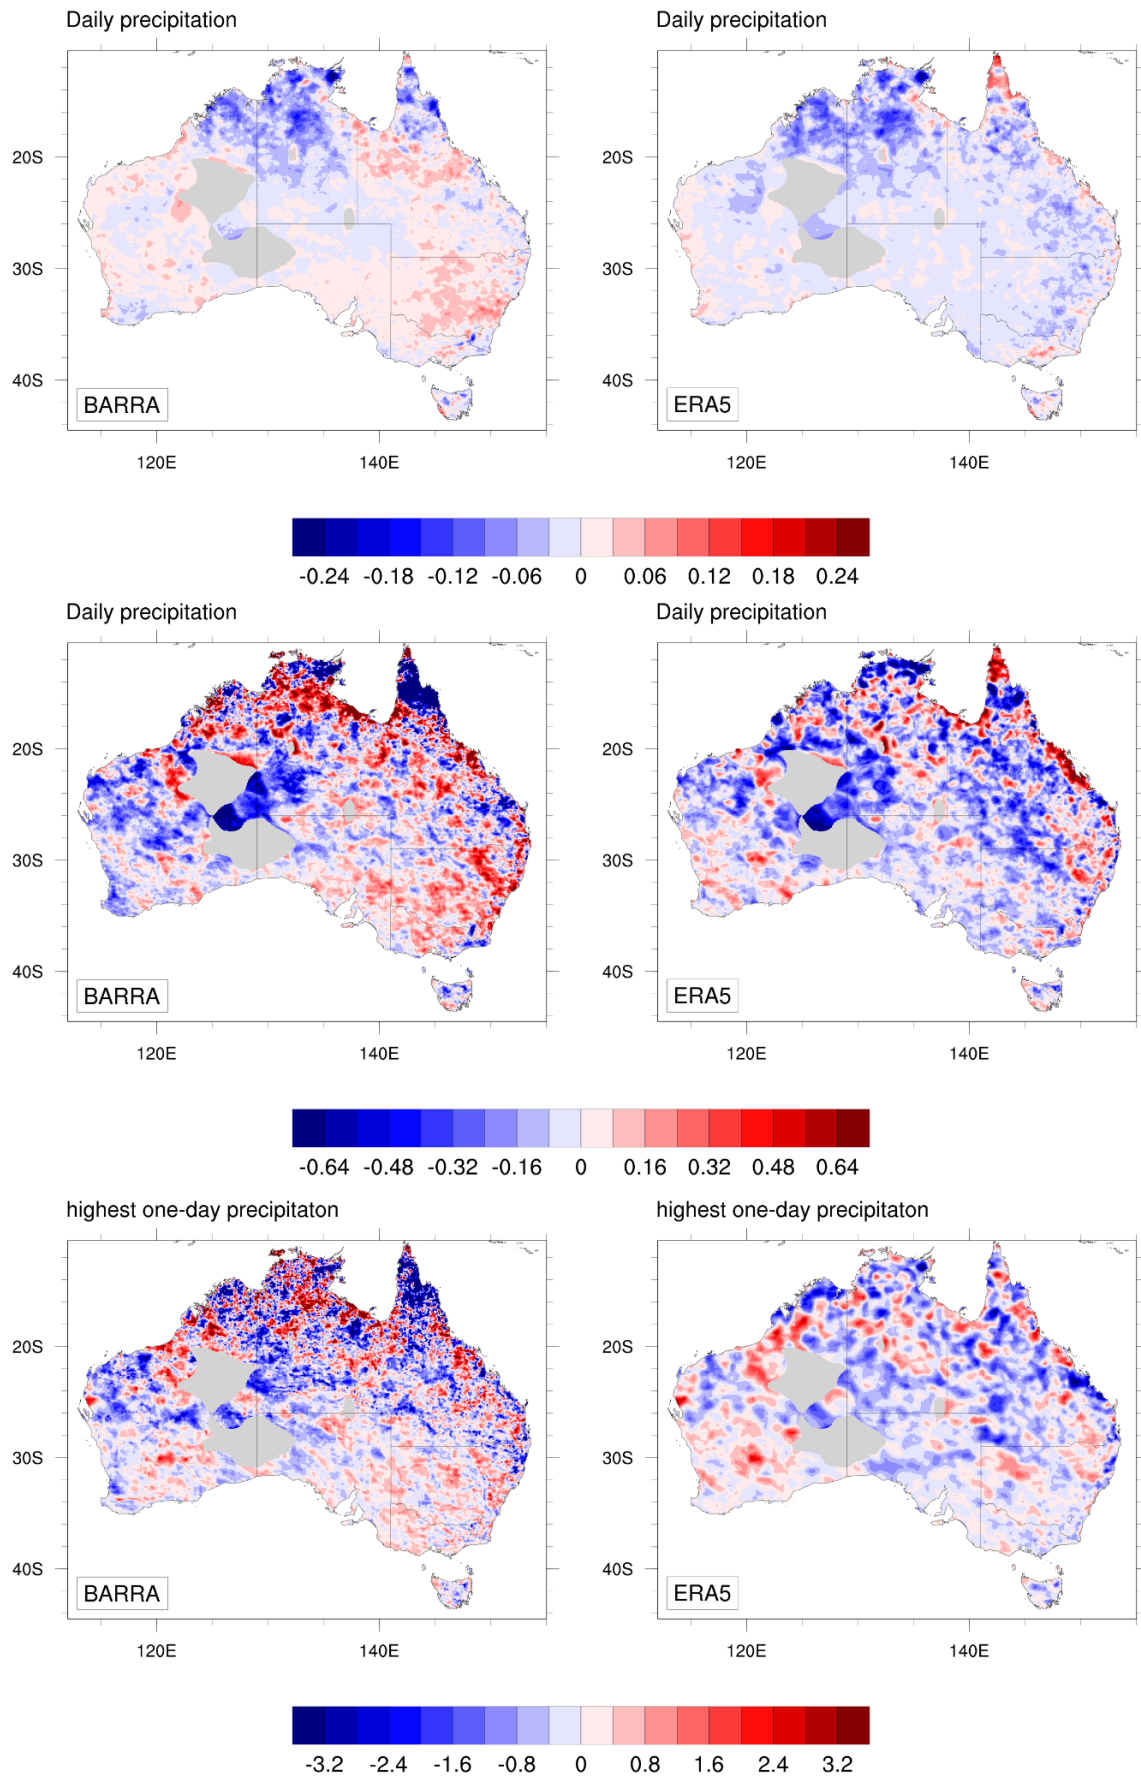

Figure S 13 (continued).
